# Supplementary material for: Triethylamine-templated nanocalix Ln12 clusters of diacylhydrazone: crystal structures and magnetic properties
Source: Royal Society of Chemistry journal article supplement (doi:10.1039/c9dt03335a), 2019-01-01
Supplement: c9dt03335a1.pdf [file c9dt03335a1.pdf]

## Electronic Supplementary Information

### Triethylamine-templated nanocalix Ln<sub>12</sub> clusters of diacylhydrazone: crystal structure and magnetic properties

Zhi-Rong Luo,<sup>a</sup> Hua-Hong Zou,<sup>\*a</sup> Zi-Lu Chen,<sup>a</sup> Bo Li,<sup>\*b</sup> Kai Wang,<sup>c</sup> Fu-Pei Liang<sup>\*a,c</sup>

<sup>a</sup>State Key Laboratory for Chemistry and Molecular Engineering of Medicinal Resources, School of Chemistry and Pharmaceutical Sciences, Guangxi Normal University, Guilin 541004, P. R. China. E-mail: fliangoffice@yahoo.com

<sup>b</sup>College of Chemistry and Pharmaceutical Engineering, Nanyang Normal University, Nanyang 473061, P. R. China. E-mail: libozzu0107@163.com

<sup>c</sup>Guangxi Key Laboratory of Electrochemical and Magnetochemical Functional Materials, College of Chemistry and Bioengineering, Guilin University of Technology, Guilin 541004, P. R. China.

#### Synthesis of H<sub>5</sub>ovih

The synthetic route for H<sub>5</sub>ovih is presented in Scheme S1. Subsequently, the dimethyl 1H-imidazole-4,5-dicarboxylate (3.68 g, 20 mmol) and N<sub>2</sub>H<sub>4</sub>·H<sub>2</sub>O (20 mL, 80%) was refluxed in MeOH (180 mL) at 85 °C for 12 h. The o-vanillin (7.6 g, 50 mmol) was then added slowly and the reaction was kept at 85 °C for another 12 h. Upon cooling and filtering, yellow solid of N,N'-bis(o-vanillidene)-1H-imidazole-4,5-dicarbohydrazide (H<sub>5</sub>ovih) was obtained with a yield of 95% (based on 1H-imidazole-4,5-dicarboxylate). HRMS (ESI) m/z: 453.1528 [M+H]<sup>+</sup>. Elemental analysis Calcd. (%): C, 55.75; H, 4.46; N, 18.58%. Found: C, 55.69; H, 4.40; N, 18.50%. IR spectrum (cm<sup>-1</sup>): 3315 (s), 3175 (vs), 2990 (m), 2842 (m), 2712 (w), 1666 (vs), 1610 (m), 1580 (s), 1547 (s), 1514 (s), 1468 (s), 1438 (s), 1361 (s), 1280 (m), 1254 (vs), 1145 (m), 1063 (s), 939 (m), 892 (m), 836 (m), 781 (m), 732 (m), 633 (w), 594 (w), 561 (m), 520 (w), 494 (w), 455 (w). <sup>1</sup>H NMR: 14.38 (s, 1H), 13.81 (s, 1H), 12.51 (s, 1H), 10.90 (s, 1H), 10.77 (s, 1H), 8.91 (s, 1H), 8.10 (s, 1H), 7.29 (d, J = 6.0

Hz, 1H), 7.16 (d,  $J = 6.0$  Hz, 1H), 7.08-7.06 (m, 2H), 6.91 (t,  $J = 8.0$  Hz, 2H), 3.84 (s, 6H);  $^{13}\text{C}$  NMR: 160.5, 154.7, 151.0, 148.8, 148.5, 147.9, 147.7, 138.1, 132.4, 128.9, 121.3, 121.2, 119.6, 119.4, 114.6, 56.4.

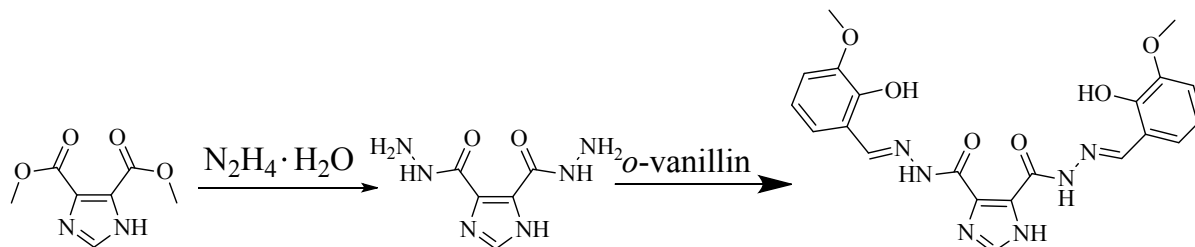

Scheme S1. Synthetic route of H<sub>5</sub>ovih.

## Crystallographic Analyses

The intensity data were recorded on a Bruker SMART CCD system with Mo-K $\alpha$  radiation ( $\lambda = 0.71073$  Å). The crystal structures were solved by Direct Methods and refined employing full-matrix least squares on  $F^2$  (SHELXTL-2008).<sup>[1]</sup> The diffraction data of compounds **1-3** were treated by the ‘SQUEEZE’ method as implemented in PLATON.<sup>[2]</sup> All non-hydrogen atoms were refined anisotropically, and hydrogen atoms of the organic ligands were generated theoretically onto the specific atoms and refined isotropically with fixed thermal factors. The unidentified solvent molecules were not included for all the three structures. CCDC 1902974-1902977 contains the supplementary crystallographic data for this paper. These data can be obtained free of charge from the Cambridge Crystallographic Data Centre via [https://www.ccdc.cam.ac.uk/data\\_request/cif](https://www.ccdc.cam.ac.uk/data_request/cif).

SQUEEZE results for these three compounds are as follows:

### (1) Compound **1**

loop\_

```
_platon_squeeze_void_nr  
_platon_squeeze_void_average_x  
_platon_squeeze_void_average_y  
_platon_squeeze_void_average_z  
_platon_squeeze_void_volume  
_platon_squeeze_void_count_electrons  
_platon_squeeze_void_content
```

|   |        |        |        |       |       |
|---|--------|--------|--------|-------|-------|
| 1 | -0.098 | -0.120 | -0.004 | 11303 | 1848" |
| 2 | 0.000  | 0.000  | 0.250  | 973   | 120"  |
| 3 | 0.000  | 0.000  | 0.750  | 973   | 120"  |
| 4 | 0.667  | 0.333  | 0.083  | 973   | 120"  |
| 5 | 0.667  | 0.333  | 0.583  | 973   | 120"  |
| 6 | 0.333  | 0.667  | 0.417  | 970   | 120"  |
| 7 | 0.333  | 0.667  | 0.917  | 970   | 120"  |

That is, SQUEEZE gives 2568 electrons/unit cell for the voids, and each formula unit has  $2531/12 = 214$  electrons (since  $Z = 12$ ). And 1  $(\text{CH}_3\text{CH}_2)_3\text{N}$  has been solved and exists in the crystal structure. Each  $(\text{CH}_3\text{CH}_2)_3\text{N}$  has 58 electrons, 1  $\text{CH}_3\text{CN}$  molecule has 22 electrons, and 1  $\text{H}_2\text{O}$  has 10 electrons. Because of the disorder of the free  $(\text{CH}_3\text{CH}_2)_3\text{N}$ ,  $\text{CH}_3\text{CN}$  and  $\text{H}_2\text{O}$  molecules, parts of the  $(\text{CH}_3\text{CH}_2)_3\text{N}$ ,  $\text{CH}_3\text{CN}$  and  $\text{H}_2\text{O}$  molecules are difficult to locate in the final structural refinement. The number of free molecules is further confirmed by elemental analyses and TGA analysis. Therefore the chemical formula of complex is found to be  $[\text{Gd}_{12}(\text{H}_2\text{Ovih})_3(\mu_3\text{-O})_9(\text{H}_2\text{O})_{24}(\text{NO}_3)_9] \cdot 2\text{C}_6\text{H}_{15}\text{N} \cdot 3\text{C}_2\text{H}_3\text{N} \cdot 9\text{H}_2\text{O}$ . The total number of electrons of the guest molecule is the same as that of the calculation. Full details can be found in the CIF files. The CCDC number is 1902975.

## (2) Compound 2

loop\_

|                                      |        |        |        |       |       |
|--------------------------------------|--------|--------|--------|-------|-------|
| _platon_squeeze_void_nr              |        |        |        |       |       |
| _platon_squeeze_void_average_x       |        |        |        |       |       |
| _platon_squeeze_void_average_y       |        |        |        |       |       |
| _platon_squeeze_void_average_z       |        |        |        |       |       |
| _platon_squeeze_void_volume          |        |        |        |       |       |
| _platon_squeeze_void_count_electrons |        |        |        |       |       |
| _platon_squeeze_void_content         |        |        |        |       |       |
| 1                                    | -0.089 | -0.103 | -0.004 | 10886 | 1935" |
| 2                                    | 0.000  | 0.000  | 0.250  | 968   | 144"  |
| 3                                    | 0.000  | 0.000  | 0.750  | 968   | 144"  |
| 4                                    | 0.667  | 0.333  | 0.083  | 973   | 144"  |
| 5                                    | 0.667  | 0.333  | 0.583  | 973   | 144"  |

|   |       |       |       |     |      |
|---|-------|-------|-------|-----|------|
| 6 | 0.333 | 0.667 | 0.417 | 974 | 144" |
| 7 | 0.333 | 0.667 | 0.917 | 974 | 144" |

That is, SQUEEZE gives 2799 electrons/unit cell for the voids, and each formula unit has  $2799/12 = 233$  electrons (since  $Z = 12$ ). And 1  $(\text{CH}_3\text{CH}_2)_3\text{N}$  has been solved and exists in the crystal structure. Each  $(\text{CH}_3\text{CH}_2)_3\text{N}$  has 58 electrons, 1  $\text{CH}_3\text{CN}$  molecule has 22 electrons, and 1  $\text{H}_2\text{O}$  has 10 electrons. Because of the disorder of the free  $(\text{CH}_3\text{CH}_2)_3\text{N}$ ,  $\text{CH}_3\text{CN}$  and  $\text{H}_2\text{O}$  molecules, parts of the  $(\text{CH}_3\text{CH}_2)_3\text{N}$ ,  $\text{CH}_3\text{CN}$  and  $\text{H}_2\text{O}$  molecules are difficult to locate in the final structural refinement. The number of free molecules is further confirmed by elemental analyses and TGA analysis. Therefore the chemical formula of complex is found to be  $[\text{Tb}_{12}(\text{H}_2\text{Ovih})_3(\mu_3\text{-O})_9(\text{H}_2\text{O})_{24}(\text{NO}_3)_9] \cdot 2\text{C}_6\text{H}_{15}\text{N} \cdot 4\text{C}_2\text{H}_3\text{N} \cdot 9\text{H}_2\text{O}$ . The total number of electrons of the guest molecule is the same as that of the calculation. Full details can be found in the CIF files. The CCDC number is 1902976.

### (3) Compound 3

loop\_

```

_platon_squeeze_void_nr
_platon_squeeze_void_average_x
_platon_squeeze_void_average_y
_platon_squeeze_void_average_z
_platon_squeeze_void_volume
_platon_squeeze_void_count_electrons
_platon_squeeze_void_content
1 -0.114 -0.125 -0.003 10312 1721"
2 0.000 0.000 0.250 924 135"
3 1.000 0.000 0.750 924 135"
4 0.667 0.333 0.083 931 135"
5 0.667 0.333 0.583 931 135"
6 0.333 0.667 0.417 932 135"
7 0.333 0.667 0.917 932 135"

```

That is, SQUEEZE gives 2531 electrons/unit cell for the voids, and each formula unit has  $2531/12 = 211$  electrons (since  $Z = 12$ ). And 1  $(\text{CH}_3\text{CH}_2)_3\text{N}$  has been solved and exists in the crystal structure. Each  $(\text{CH}_3\text{CH}_2)_3\text{N}$  has 58 electrons, 1  $\text{CH}_3\text{CN}$

molecule has 22 electrons, and 1 H<sub>2</sub>O has 10 electrons. Because of the disorder of the free (CH<sub>3</sub>CH<sub>2</sub>)<sub>3</sub>N, CH<sub>3</sub>CN and H<sub>2</sub>O molecules, parts of the (CH<sub>3</sub>CH<sub>2</sub>)<sub>3</sub>N, CH<sub>3</sub>CN and H<sub>2</sub>O molecules are difficult to locate in the final structural refinement. The number of free molecules is further confirmed by elemental analyses and TGA analysis. Therefore the chemical formula of complex is found to be [Dy<sub>12</sub>(H<sub>2</sub>Ov<sub>ih</sub>)<sub>3</sub>(μ<sub>3</sub>-O)<sub>9</sub>(H<sub>2</sub>O)<sub>24</sub>(NO<sub>3</sub>)<sub>9</sub>]·2C<sub>6</sub>H<sub>15</sub>N·3C<sub>2</sub>H<sub>3</sub>N·9H<sub>2</sub>O. The total number of electrons of the guest molecule is the same as that of the calculation. Full details can be found in the CIF files. The CCDC number is 1902977.

**Table S1 Crystal data and structure refinements for the ligand and the compounds 1-3.**

| Compound                                                         | ligand                                                             | <b>1</b>                                                                          | <b>2</b>                                                                          | <b>3</b>                                                                          |
|------------------------------------------------------------------|--------------------------------------------------------------------|-----------------------------------------------------------------------------------|-----------------------------------------------------------------------------------|-----------------------------------------------------------------------------------|
| CCDC No.                                                         | 1902974                                                            | 1902975                                                                           | 1902976                                                                           | 1902977                                                                           |
| Empirical formula                                                | C <sub>23</sub> H <sub>23</sub> N <sub>7</sub> O <sub>6</sub>      | C <sub>69</sub> H <sub>114</sub> Gd <sub>12</sub> N <sub>28</sub> O <sub>78</sub> | C <sub>69</sub> H <sub>114</sub> Tb <sub>12</sub> N <sub>28</sub> O <sub>78</sub> | C <sub>69</sub> H <sub>114</sub> Dy <sub>12</sub> N <sub>28</sub> O <sub>78</sub> |
| Formula weight                                                   | 493.48                                                             | 4470.88                                                                           | 4490.92                                                                           | 4533.88                                                                           |
| Temperature (K)                                                  | 150(2)                                                             | 150(2)                                                                            | 150(2)                                                                            | 150(2)                                                                            |
| Crystal system                                                   | Monoclinic                                                         | Trigonal                                                                          | Trigonal                                                                          | Trigonal                                                                          |
| Space group                                                      | <i>P2<sub>1</sub>/c</i>                                            | <i>Rc</i>                                                                         | <i>Rc</i>                                                                         | <i>Rc</i>                                                                         |
| Unit cell dimensions                                             |                                                                    |                                                                                   |                                                                                   |                                                                                   |
| <i>a</i> (Å)                                                     | 4.6284(2)                                                          | 31.0997(3)                                                                        | 31.0269(10)                                                                       | 30.9262(8)                                                                        |
| <i>b</i> (Å)                                                     | 18.7941(10)                                                        | 31.0997(3)                                                                        | 31.0269(10)                                                                       | 30.9262(8)                                                                        |
| <i>c</i> (Å)                                                     | 26.5269(14)                                                        | 61.3340(12)                                                                       | 60.690(3)                                                                         | 60.130(3)                                                                         |
| $\alpha$ (°)                                                     | 90                                                                 | 90                                                                                | 90                                                                                | 90                                                                                |
| $\beta$ (°)                                                      | 93.527(2)                                                          | 90                                                                                | 90                                                                                | 90                                                                                |
| $\gamma$ (°)                                                     | 90                                                                 | 120                                                                               | 120                                                                               | 120                                                                               |
| Volume (Å <sup>3</sup> ), <i>Z</i>                               | 2303.1(2), 4                                                       | 51375.1(4), 12                                                                    | 50597(4), 12                                                                      | 49805(4), 12                                                                      |
| Calculated density (g·cm <sup>-3</sup> )                         | 1.423                                                              | 1.734                                                                             | 1.769                                                                             | 1.814                                                                             |
| Absorption coefficient (mm <sup>-1</sup> )                       | 0.106                                                              | 4.661                                                                             | 5.046                                                                             | 5.415                                                                             |
| <i>F</i> (000)                                                   | 1032                                                               | 25392                                                                             | 25536                                                                             | 25680                                                                             |
| $\theta$ range for data collection (°)                           | 2.300-25.010                                                       | 1.310-26.998                                                                      | 2.274-25.442                                                                      | 2.281-25.401                                                                      |
| Data/restraints/parameters                                       | 4070 / 0 / 330                                                     | 12448 / 2 / 565                                                                   | 10355 / 2 / 565                                                                   | 10171 / 3 / 565                                                                   |
| Goodness-of-fit on <i>F</i> <sup>2</sup>                         | 1.041                                                              | 1.048                                                                             | 1.057                                                                             | 1.024                                                                             |
| Final <i>R</i> <sup>a</sup> indices [ <i>I</i> > 2σ( <i>I</i> )] | <i>R</i> <sub>1</sub> = 0.0480,<br><i>wR</i> <sub>2</sub> = 0.1100 | <i>R</i> <sub>1</sub> = 0.0291,<br><i>wR</i> <sub>2</sub> = 0.0922                | <i>R</i> <sub>1</sub> = 0.0285,<br><i>wR</i> <sub>2</sub> = 0.0845                | <i>R</i> <sub>1</sub> = 0.0370,<br><i>wR</i> <sub>2</sub> = 0.0753                |
| <i>R</i> indices (all data)                                      | <i>R</i> <sub>1</sub> = 0.0748,<br><i>wR</i> <sub>2</sub> = 0.1280 | <i>R</i> <sub>1</sub> = 0.0356,<br><i>wR</i> <sub>2</sub> = 0.0955                | <i>R</i> <sub>1</sub> = 0.0356,<br><i>wR</i> <sub>2</sub> = 0.0868                | <i>R</i> <sub>1</sub> = 0.0644,<br><i>wR</i> <sub>2</sub> = 0.0797                |

$$^a R_1 = \frac{\sum ||F_0| - |F_c||}{\sum |F_0|}, \quad ^b wR_2 = \left[ \frac{\sum [\omega(F_0^2 - F_c^2)^2]}{\sum [\omega(F_0^2)^2]} \right]^{1/2}$$

## Thermal analysis

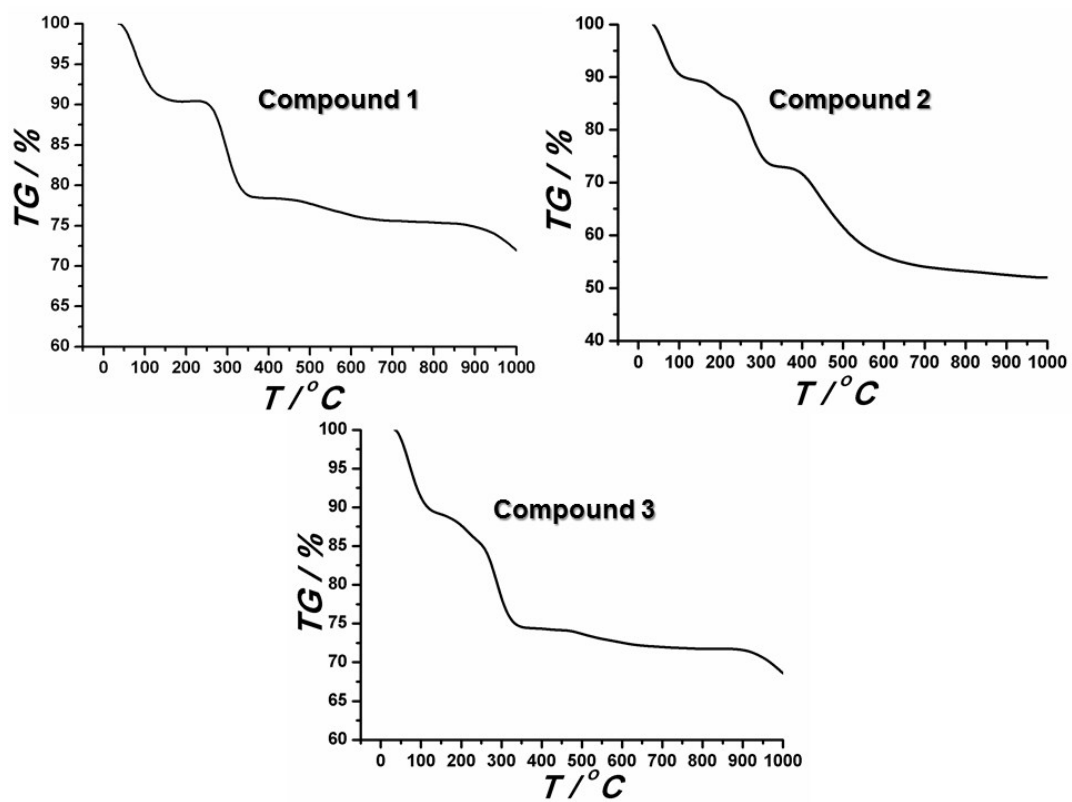

Figure S1 Complexes 1-3 TG curves.

## PXRD analysis

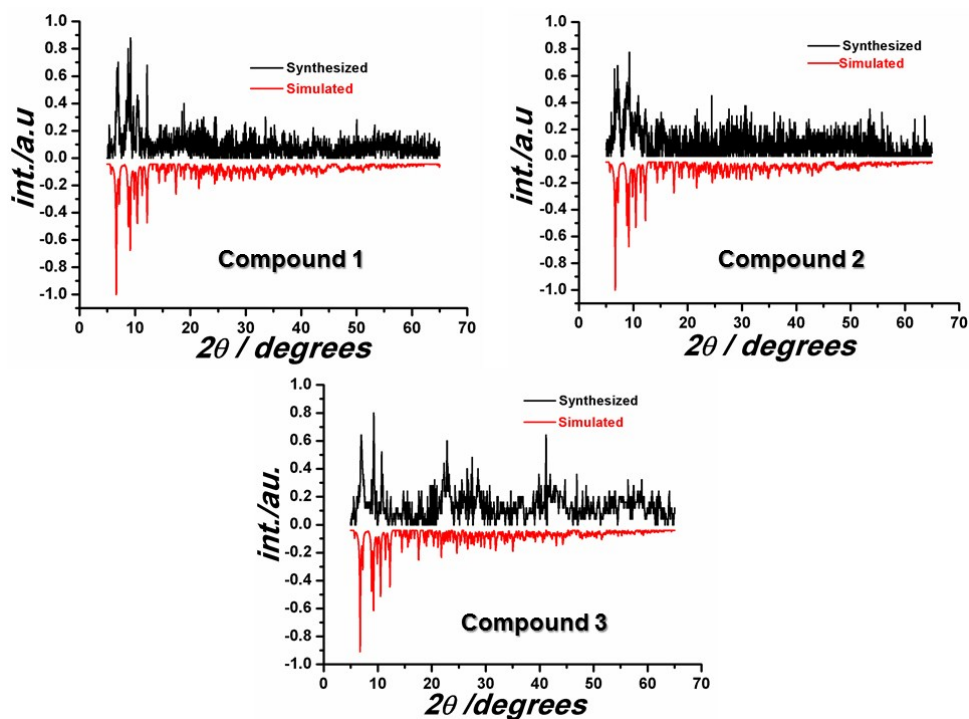

Figure S2 Experimental X-ray diffraction and simulated X-ray diffraction diagrams of 1-3.

### Structural Details

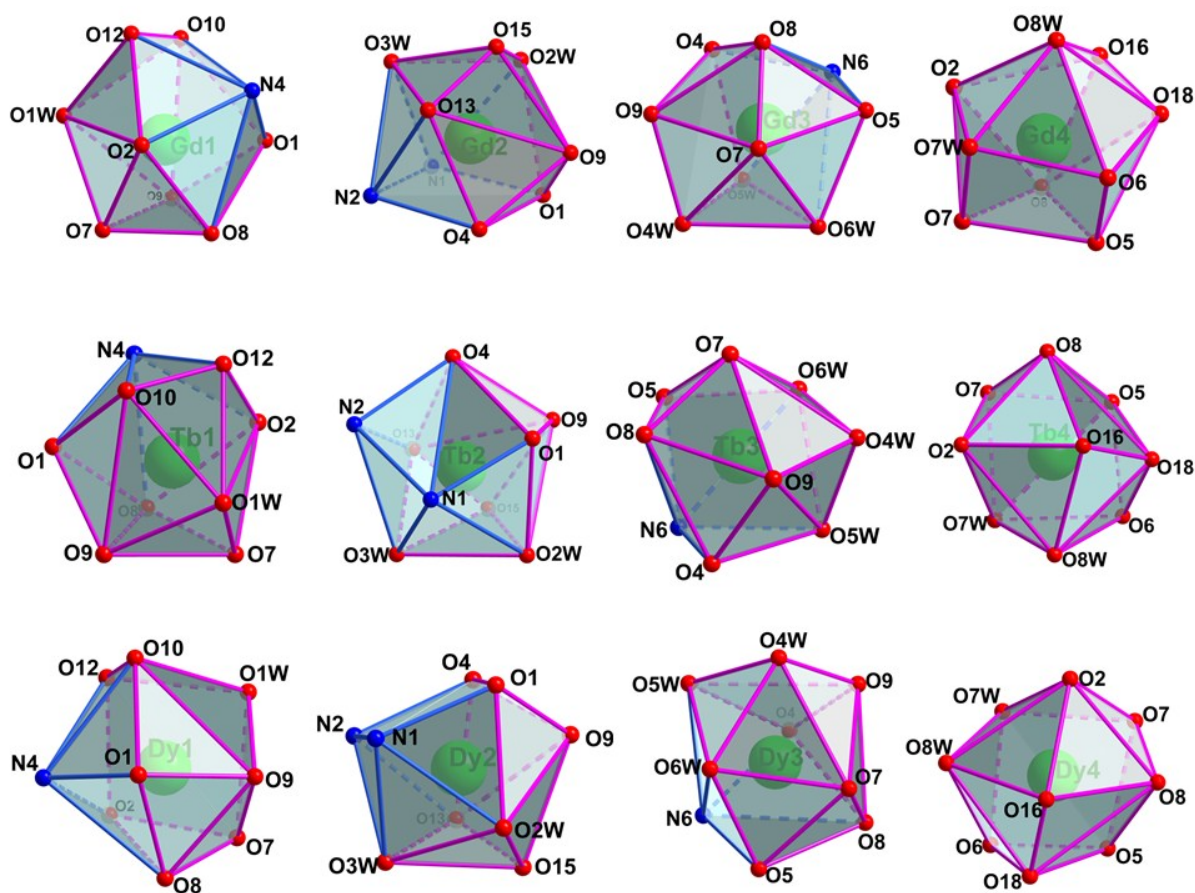

Figure S3 Coordination polyhedron surrounding of Ln(III) for 1-3.

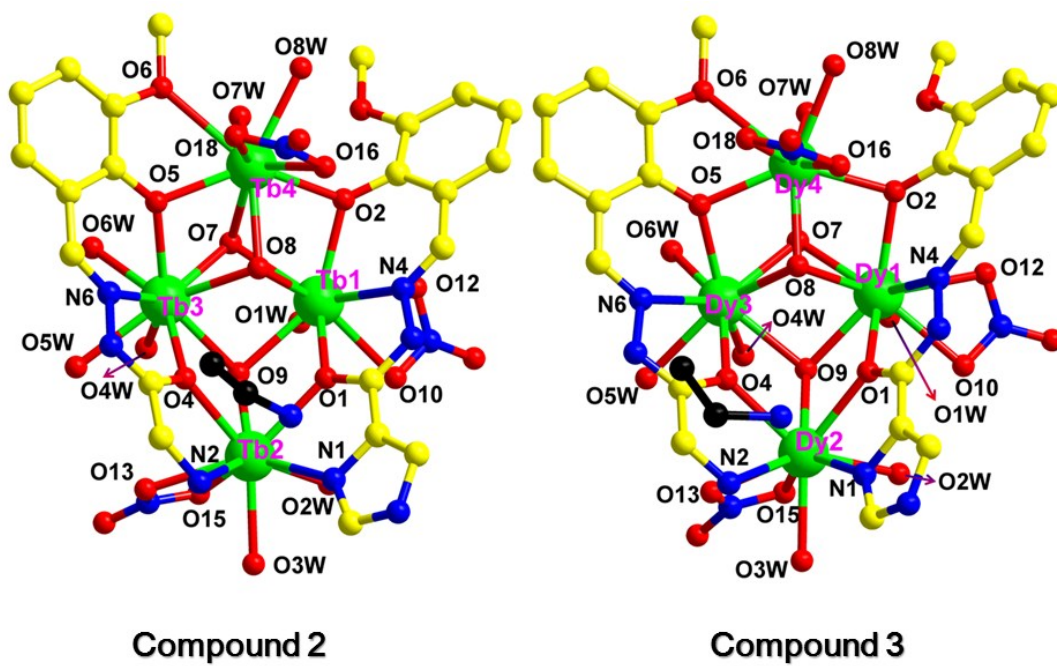

Figure S4 The asymmetry unit of 2-3. Tb and Dy, green; C, yellow and black; N, blue; O, red.



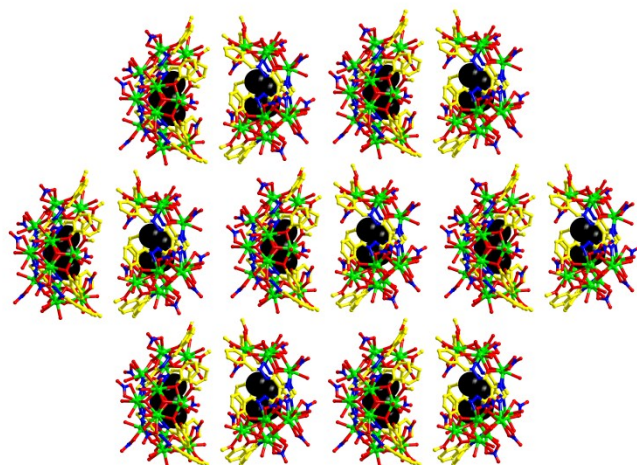

Figure S5 Packing diagram of **1**. Gd, green; C, yellow and black; N, blue; O, red.

## Magnetic analysis

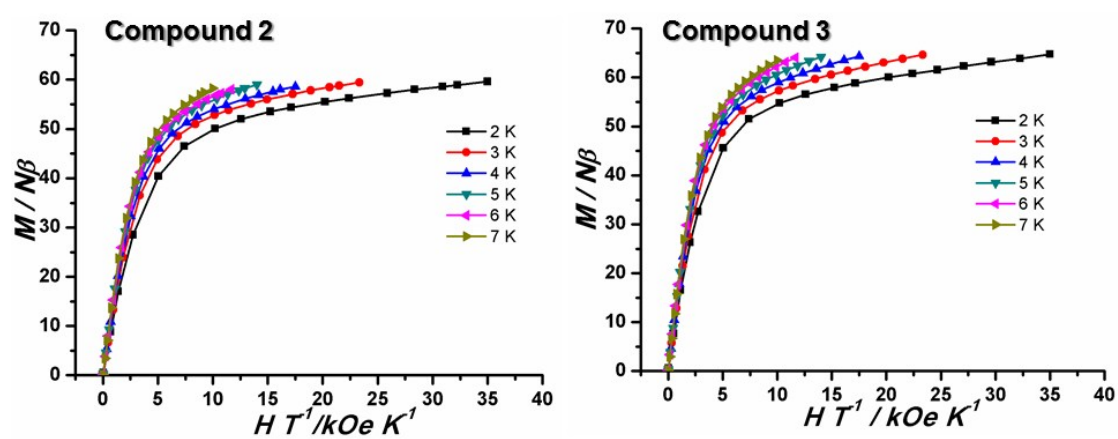

Fig. S6 Plots of  $M-HT^{-1}$  of **2-3** at 2-7 K.

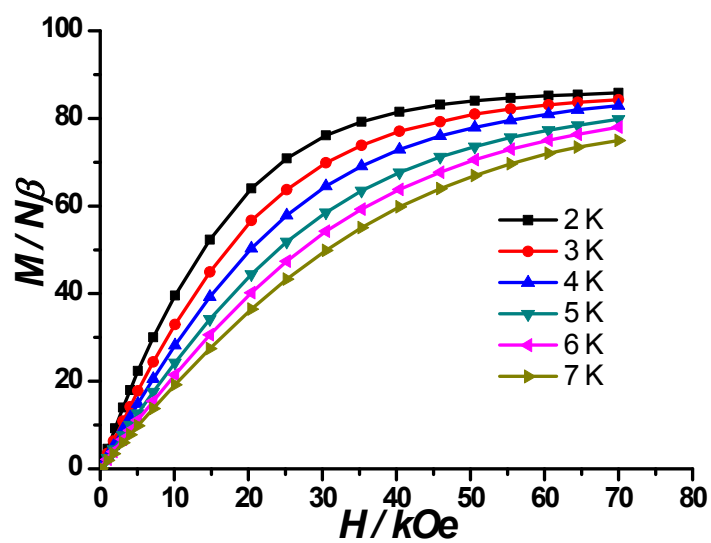

Fig. S7 Plots of  $M-H$  of **1** in the range of  $T = 2-7$  K and  $H = 0-70$  kOe.

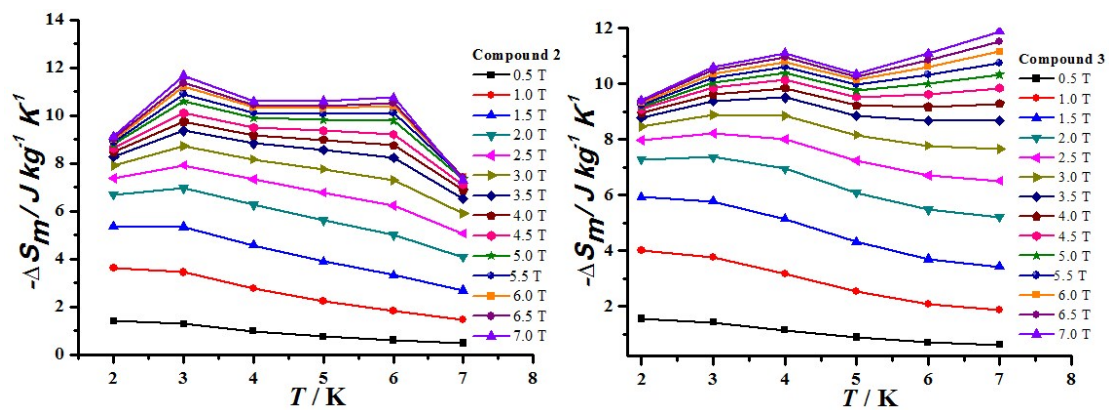

Figure S8 The plots of  $-\Delta S_m-T$  of **2-3** in the range of  $T = 2-7$  K and  $H = 0.5-7$  T.

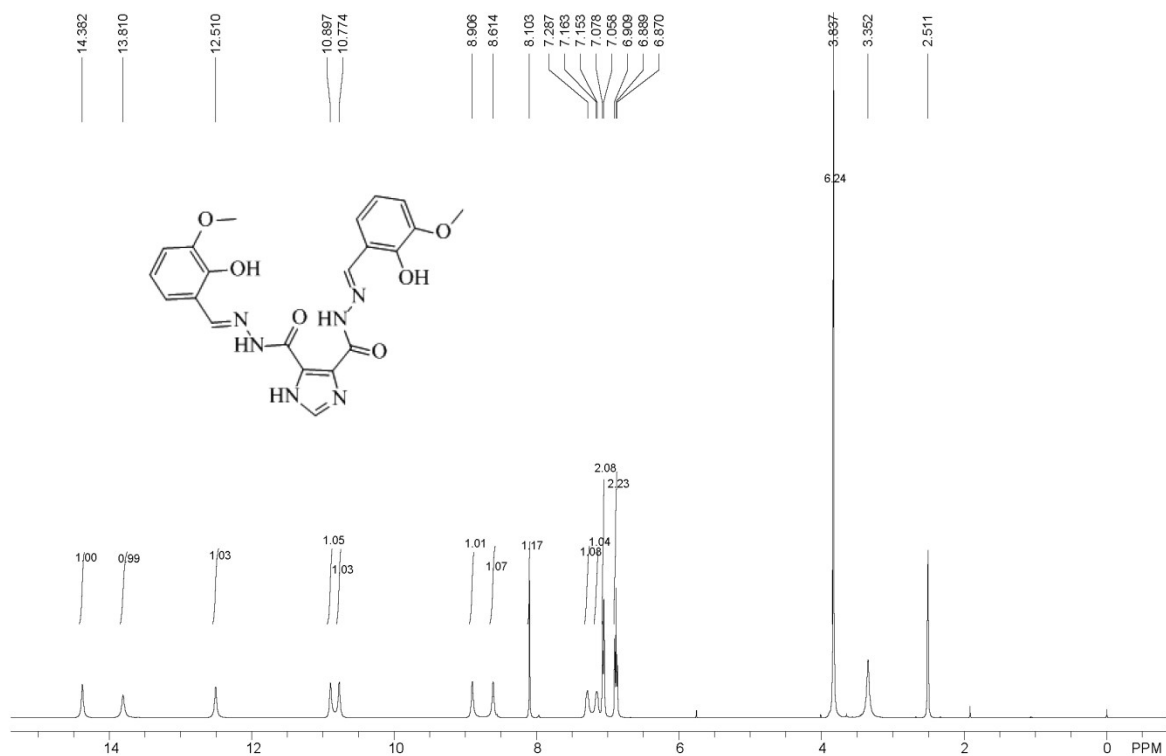

Figure S9 The <sup>1</sup>H NMR of H<sub>5</sub>ovih.

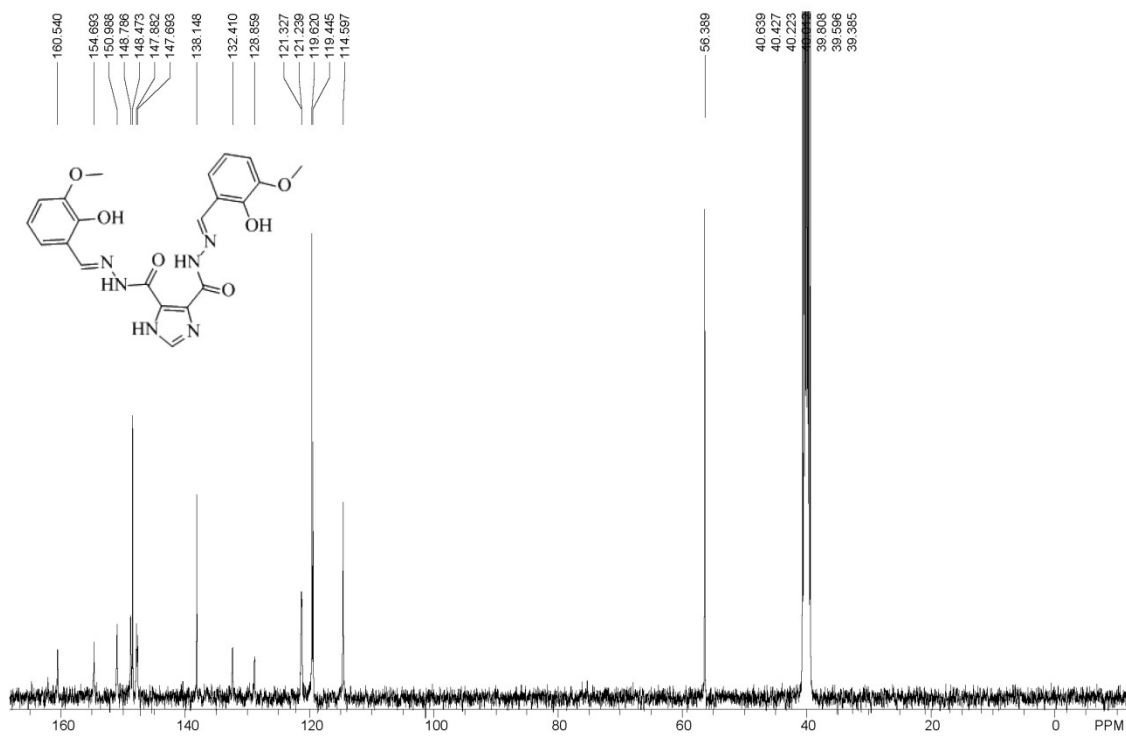

Figure S10 The <sup>13</sup>C NMR of H<sub>5</sub>ovih.

Table S2 Selected bond lengths (Å) and angles (°) for **1-3****1**

|                   |            |                   |            |
|-------------------|------------|-------------------|------------|
| Gd(1)-O(2)        | 2.347(3)   | Gd(1)-O(8)        | 2.375(3)   |
| Gd(1)-O(7)        | 2.411(3)   | Gd(1)-O(9)        | 2.421(3)   |
| Gd(1)-O(1)        | 2.435(3)   | Gd(1)-O(10)       | 2.512(3)   |
| Gd(1)-O(1W)       | 2.503(3)   | Gd(1)-O(12)       | 2.515(3)   |
| Gd(1)-N(4)        | 2.556(4)   | Gd(1)-N(7)        | 2.929(4)   |
| Gd(2)-O(9)        | 2.401(3)   | Gd(2)-O(3W)       | 2.426(3)   |
| Gd(2)-O(2W)       | 2.438(3)   | Gd(2)-O(4)        | 2.439(3)   |
| Gd(2)-O(1)        | 2.455(3)   | Gd(2)-O(13)       | 2.478(4)   |
| Gd(2)-N(2)        | 2.529(3)   | Gd(2)-N(1)        | 2.529(3)   |
| Gd(2)-O(15)       | 2.614(3)   | Gd(2)-N(8)        | 2.955(4)   |
| Gd(3)-O(7)        | 2.342(3)   | Gd(3)-O(6W)       | 2.362(3)   |
| Gd(3)-O(5)        | 2.359(3)   | Gd(3)-O(8)        | 2.380(3)   |
| Gd(3)-O(4)        | 2.386(3)   | Gd(3)-O(9)        | 2.434(3)   |
| Gd(3)-O(5W)       | 2.510(3)   | Gd(3)-N(6)        | 2.543(4)   |
| Gd(3)-O(4W)       | 2.608(4)   | Gd(4)-O(5)        | 2.328(3)   |
| Gd(4)-O(8)        | 2.388(3)   | Gd(4)-O(2)        | 2.385(3)   |
| Gd(4)-O(7)        | 2.406(3)   | Gd(4)-O(8W)       | 2.417(3)   |
| Gd(4)-O(7W)       | 2.429(3)   | Gd(4)-O(18)       | 2.463(3)   |
| Gd(4)-O(16)       | 2.554(4)   | Gd(4)-O(6)        | 2.667(3)   |
| Gd(4)-N(9)        | 2.903(4)   | O(2)-Gd(1)-O(8)   | 76.89(10)  |
| O(2)-Gd(1)-O(7)   | 71.26(11)  | O(8)-Gd(1)-O(7)   | 59.66(9)   |
| O(2)-Gd(1)-O(9)   | 144.39(10) | O(8)-Gd(1)-O(9)   | 75.91(9)   |
| O(7)-Gd(1)-O(9)   | 75.31(10)  | O(2)-Gd(1)-O(1)   | 127.64(10) |
| O(8)-Gd(1)-O(1)   | 74.21(9)   | O(7)-Gd(1)-O(1)   | 124.74(10) |
| O(9)-Gd(1)-O(1)   | 64.83(9)   | O(2)-Gd(1)-O(10)  | 121.39(11) |
| O(8)-Gd(1)-O(10)  | 145.17(10) | O(7)-Gd(1)-O(10)  | 150.36(11) |
| O(9)-Gd(1)-O(10)  | 93.89(10)  | O(1)-Gd(1)-O(10)  | 71.36(10)  |
| O(2)-Gd(1)-O(1W)  | 104.69(11) | O(8)-Gd(1)-O(1W)  | 132.71(10) |
| O(7)-Gd(1)-O(1W)  | 75.85(11)  | O(9)-Gd(1)-O(1W)  | 78.21(10)  |
| O(1)-Gd(1)-O(1W)  | 126.99(10) | O(10)-Gd(1)-O(1W) | 74.93(11)  |
| O(2)-Gd(1)-O(12)  | 73.21(10)  | O(8)-Gd(1)-O(12)  | 146.06(10) |
| O(7)-Gd(1)-O(12)  | 122.64(10) | O(9)-Gd(1)-O(12)  | 137.82(10) |
| O(1)-Gd(1)-O(12)  | 112.59(10) | O(10)-Gd(1)-O(12) | 50.58(10)  |
| O(1W)-Gd(1)-O(12) | 71.49(11)  | O(2)-Gd(1)-N(4)   | 71.12(11)  |
| O(8)-Gd(1)-N(4)   | 83.68(10)  | O(7)-Gd(1)-N(4)   | 132.09(11) |
| O(9)-Gd(1)-N(4)   | 127.44(10) | O(1)-Gd(1)-N(4)   | 63.12(10)  |
| O(10)-Gd(1)-N(4)  | 76.37(11)  | O(1W)-Gd(1)-N(4)  | 142.56(11) |
| O(12)-Gd(1)-N(4)  | 71.80(11)  | O(2)-Gd(1)-N(7)   | 97.89(11)  |
| O(8)-Gd(1)-N(7)   | 158.04(11) | O(7)-Gd(1)-N(7)   | 139.37(11) |
| O(9)-Gd(1)-N(7)   | 115.64(11) | O(1)-Gd(1)-N(7)   | 93.36(11)  |
| O(10)-Gd(1)-N(7)  | 25.50(11)  | O(1W)-Gd(1)-N(7)  | 69.22(11)  |

|                   |            |                   |            |
|-------------------|------------|-------------------|------------|
| O(12)-Gd(1)-N(7)  | 25.25(10)  | N(4)-Gd(1)-N(7)   | 74.50(11)  |
| O(9)-Gd(2)-O(3W)  | 142.58(10) | O(9)-Gd(2)-O(2W)  | 84.08(10)  |
| O(3W)-Gd(2)-O(2W) | 75.41(10)  | O(9)-Gd(2)-O(4)   | 65.96(9)   |
| O(3W)-Gd(2)-O(4)  | 135.09(10) | O(2W)-Gd(2)-O(4)  | 148.38(10) |
| O(9)-Gd(2)-O(1)   | 64.81(9)   | O(3W)-Gd(2)-O(1)  | 135.54(10) |
| O(2W)-Gd(2)-O(1)  | 75.39(9)   | O(4)-Gd(2)-O(1)   | 82.54(10)  |
| O(9)-Gd(2)-O(13)  | 91.00(11)  | O(3W)-Gd(2)-O(13) | 72.86(12)  |
| O(2W)-Gd(2)-O(13) | 118.88(11) | O(4)-Gd(2)-O(13)  | 73.51(11)  |
| O(1)-Gd(2)-O(13)  | 151.53(11) | O(9)-Gd(2)-N(2)   | 130.53(10) |
| O(3W)-Gd(2)-N(2)  | 76.29(10)  | O(2W)-Gd(2)-N(2)  | 145.24(11) |
| O(4)-Gd(2)-N(2)   | 64.86(10)  | O(1)-Gd(2)-N(2)   | 113.13(10) |
| O(13)-Gd(2)-N(2)  | 70.37(11)  | O(9)-Gd(2)-N(1)   | 129.27(11) |
| O(3W)-Gd(2)-N(1)  | 77.70(11)  | O(2W)-Gd(2)-N(1)  | 79.72(11)  |
| O(4)-Gd(2)-N(1)   | 110.94(10) | O(1)-Gd(2)-N(1)   | 64.64(10)  |
| O(13)-Gd(2)-N(1)  | 138.59(12) | N(2)-Gd(2)-N(1)   | 74.87(11)  |
| O(9)-Gd(2)-O(15)  | 70.40(10)  | O(3W)-Gd(2)-O(15) | 73.61(10)  |
| O(2W)-Gd(2)-O(15) | 72.11(11)  | O(4)-Gd(2)-O(15)  | 104.93(10) |
| O(1)-Gd(2)-O(15)  | 126.39(10) | O(13)-Gd(2)-O(15) | 49.45(11)  |
| N(2)-Gd(2)-O(15)  | 118.01(11) | N(1)-Gd(2)-O(15)  | 143.81(10) |
| O(9)-Gd(2)-N(8)   | 82.38(10)  | O(3W)-Gd(2)-N(8)  | 69.29(11)  |
| O(2W)-Gd(2)-N(8)  | 95.93(11)  | O(4)-Gd(2)-N(8)   | 90.11(11)  |
| O(1)-Gd(2)-N(8)   | 146.57(10) | O(13)-Gd(2)-N(8)  | 23.69(11)  |
| N(2)-Gd(2)-N(8)   | 92.56(11)  | N(1)-Gd(2)-N(8)   | 146.67(11) |
| O(15)-Gd(2)-N(8)  | 25.93(11)  | O(7)-Gd(3)-O(6W)  | 79.49(11)  |
| O(7)-Gd(3)-O(5)   | 73.89(10)  | O(6W)-Gd(3)-O(5)  | 71.03(11)  |
| O(7)-Gd(3)-O(8)   | 60.55(10)  | O(6W)-Gd(3)-O(8)  | 129.68(10) |
| O(5)-Gd(3)-O(8)   | 69.48(10)  | O(7)-Gd(3)-O(4)   | 129.95(10) |
| O(6W)-Gd(3)-O(4)  | 149.85(11) | O(5)-Gd(3)-O(4)   | 118.70(10) |
| O(8)-Gd(3)-O(4)   | 78.31(10)  | O(7)-Gd(3)-O(9)   | 76.31(10)  |
| O(6W)-Gd(3)-O(9)  | 125.50(10) | O(5)-Gd(3)-O(9)   | 141.99(10) |
| O(8)-Gd(3)-O(9)   | 75.55(9)   | O(4)-Gd(3)-O(9)   | 66.27(9)   |
| O(7)-Gd(3)-O(5W)  | 142.78(12) | O(6W)-Gd(3)-O(5W) | 76.45(11)  |
| O(5)-Gd(3)-O(5W)  | 122.76(12) | O(8)-Gd(3)-O(5W)  | 152.96(10) |
| O(4)-Gd(3)-O(5W)  | 74.74(11)  | O(9)-Gd(3)-O(5W)  | 95.21(11)  |
| O(7)-Gd(3)-N(6)   | 139.10(11) | O(6W)-Gd(3)-N(6)  | 99.35(11)  |
| O(5)-Gd(3)-N(6)   | 67.37(10)  | O(8)-Gd(3)-N(6)   | 93.07(10)  |
| O(4)-Gd(3)-N(6)   | 63.86(10)  | O(9)-Gd(3)-N(6)   | 130.12(10) |
| O(5W)-Gd(3)-N(6)  | 73.29(12)  | O(7)-Gd(3)-O(4W)  | 81.83(13)  |
| O(6W)-Gd(3)-O(4W) | 70.06(12)  | O(5)-Gd(3)-O(4W)  | 137.06(12) |
| O(8)-Gd(3)-O(4W)  | 126.61(11) | O(4)-Gd(3)-O(4W)  | 104.09(12) |
| O(9)-Gd(3)-O(4W)  | 58.71(11)  | O(5W)-Gd(3)-O(4W) | 63.47(14)  |
| N(6)-Gd(3)-O(4W)  | 136.73(13) | O(5)-Gd(4)-O(8)   | 69.86(10)  |
| O(5)-Gd(4)-O(2)   | 139.29(10) | O(8)-Gd(4)-O(2)   | 75.91(9)   |
| O(5)-Gd(4)-O(7)   | 73.26(10)  | O(8)-Gd(4)-O(7)   | 59.56(9)   |

|                   |            |                   |            |
|-------------------|------------|-------------------|------------|
| O(2)-Gd(4)-O(7)   | 70.70(10)  | O(5)-Gd(4)-O(8W)  | 134.92(11) |
| O(8)-Gd(4)-O(8W)  | 144.71(11) | O(2)-Gd(4)-O(8W)  | 85.72(11)  |
| O(7)-Gd(4)-O(8W)  | 140.77(11) | O(5)-Gd(4)-O(7W)  | 103.90(11) |
| O(8)-Gd(4)-O(7W)  | 132.86(10) | O(2)-Gd(4)-O(7W)  | 83.61(10)  |
| O(7)-Gd(4)-O(7W)  | 73.72(10)  | O(8W)-Gd(4)-O(7W) | 72.84(11)  |
| O(5)-Gd(4)-O(18)  | 75.88(11)  | O(8)-Gd(4)-O(18)  | 89.26(10)  |
| O(2)-Gd(4)-O(18)  | 125.68(11) | O(7)-Gd(4)-O(18)  | 141.99(10) |
| O(8W)-Gd(4)-O(18) | 77.24(11)  | O(7W)-Gd(4)-O(18) | 135.98(11) |
| O(5)-Gd(4)-O(16)  | 113.58(12) | O(8)-Gd(4)-O(16)  | 74.97(11)  |
| O(2)-Gd(4)-O(16)  | 76.72(12)  | O(7)-Gd(4)-O(16)  | 128.74(11) |
| O(8W)-Gd(4)-O(16) | 71.57(12)  | O(7W)-Gd(4)-O(16) | 140.27(12) |
| O(18)-Gd(4)-O(16) | 48.97(12)  | O(5)-Gd(4)-O(6)   | 61.75(10)  |
| O(8)-Gd(4)-O(6)   | 130.98(9)  | O(2)-Gd(4)-O(6)   | 150.83(9)  |
| O(7)-Gd(4)-O(6)   | 110.36(10) | O(8W)-Gd(4)-O(6)  | 75.96(11)  |
| O(7W)-Gd(4)-O(6)  | 69.48(10)  | O(18)-Gd(4)-O(6)  | 72.46(11)  |
| O(16)-Gd(4)-O(6)  | 117.22(12) | O(5)-Gd(4)-N(9)   | 94.59(12)  |
| O(8)-Gd(4)-N(9)   | 81.24(11)  | O(2)-Gd(4)-N(9)   | 101.43(12) |
| O(7)-Gd(4)-N(9)   | 140.80(11) | O(8W)-Gd(4)-N(9)  | 73.10(12)  |
| O(7W)-Gd(4)-N(9)  | 145.05(11) | O(18)-Gd(4)-N(9)  | 24.26(11)  |
| O(16)-Gd(4)-N(9)  | 24.71(12)  | O(6)-Gd(4)-N(9)   | 94.81(12)  |

## 2

|                 |            |                 |            |
|-----------------|------------|-----------------|------------|
| Tb(1)-N(4)      | 2.553(4)   | Tb(1)-O(1)      | 2.429(3)   |
| Tb(1)-O(2)      | 2.327(3)   | Tb(1)-O(7)      | 2.398(3)   |
| Tb(1)-O(8)      | 2.345(3)   | Tb(1)-O(9)      | 2.402(3)   |
| Tb(1)-O(10)     | 2.499(3)   | Tb(1)-O(12)     | 2.499(3)   |
| Tb(1)-O(1W)     | 2.456(4)   | Tb(2)-N(1)      | 2.498(3)   |
| Tb(2)-N(2)      | 2.549(3)   | Tb(2)-O(1)      | 2.428(3)   |
| Tb(2)-O(4)      | 2.424(3)   | Tb(2)-O(9)      | 2.370(3)   |
| Tb(2)-O(13)     | 2.478(3)   | Tb(2)-O(13)     | 2.478(3)   |
| Tb(2)-O(2W)     | 2.423(3)   | Tb(2)-O(3W)     | 2.396(3)   |
| Tb(3)-N(6)      | 2.524(4)   | Tb(3)-O(4)      | 2.381(3)   |
| Tb(3)-O(5)      | 2.317(3)   | Tb(3)-O(7)      | 2.335(3)   |
| Tb(3)-O(8)      | 2.395(3)   | Tb(3)-O(9)      | 2.430(3)   |
| Tb(3)-O(6W)     | 2.411(3)   | Tb(3)-O(4W)     | 2.4651(11) |
| Tb(3)-O(5W)     | 2.478(3)   | Tb(4)-O(2)      | 2.379(3)   |
| Tb(4)-O(5)      | 2.322(3)   | Tb(4)-O(6)      | 2.644(3)   |
| Tb(4)-O(7)      | 2.389(3)   | Tb(4)-O(8)      | 2.384(3)   |
| Tb(4)-O(16)     | 2.532(3)   | Tb(4)-O(18)     | 2.431(4)   |
| Tb(4)-O(7W)     | 2.413(3)   | Tb(4)-O(8W)     | 2.422(4)   |
| O(2)-Tb(1)-O(8) | 77.29(10)  | O(2)-Tb(1)-O(7) | 71.67(10)  |
| O(8)-Tb(1)-O(7) | 60.89(10)  | O(2)-Tb(1)-O(9) | 145.19(10) |
| O(8)-Tb(1)-O(9) | 76.28(10)  | O(7)-Tb(1)-O(9) | 75.83(10)  |
| O(2)-Tb(1)-O(1) | 128.19(10) | O(8)-Tb(1)-O(1) | 73.76(9)   |

|                   |            |                   |            |
|-------------------|------------|-------------------|------------|
| O(7)-Tb(1)-O(1)   | 124.88(10) | O(9)-Tb(1)-O(1)   | 63.83(9)   |
| O(2)-Tb(1)-O(1W)  | 107.00(14) | O(8)-Tb(1)-O(1W)  | 133.72(11) |
| O(7)-Tb(1)-O(1W)  | 76.51(12)  | O(9)-Tb(1)-O(1W)  | 76.58(13)  |
| O(1)-Tb(1)-O(1W)  | 124.11(14) | O(2)-Tb(1)-O(10)  | 121.16(10) |
| O(8)-Tb(1)-O(10)  | 143.71(10) | O(7)-Tb(1)-O(10)  | 150.64(11) |
| O(9)-Tb(1)-O(10)  | 93.42(10)  | O(1)-Tb(1)-O(10)  | 70.53(10)  |
| O(1W)-Tb(1)-O(10) | 74.42(13)  | O(2)-Tb(1)-O(12)  | 73.40(11)  |
| O(8)-Tb(1)-O(12)  | 146.03(11) | O(7)-Tb(1)-O(12)  | 122.95(10) |
| O(9)-Tb(1)-O(12)  | 137.25(11) | O(1)-Tb(1)-O(12)  | 112.17(10) |
| O(1W)-Tb(1)-O(12) | 72.45(12)  | O(10)-Tb(1)-O(12) | 50.35(10)  |
| O(2)-Tb(1)-N(4)   | 71.24(11)  | O(8)-Tb(1)-N(4)   | 82.91(10)  |
| O(7)-Tb(1)-N(4)   | 132.60(11) | O(9)-Tb(1)-N(4)   | 126.70(10) |
| O(1)-Tb(1)-N(4)   | 63.36(10)  | O(1W)-Tb(1)-N(4)  | 142.96(12) |
| O(10)-Tb(1)-N(4)  | 75.67(11)  | O(12)-Tb(1)-N(4)  | 71.75(11)  |
| O(9)-Tb(2)-O(3W)  | 142.88(11) | O(9)-Tb(2)-O(4)   | 66.28(9)   |
| O(3W)-Tb(2)-O(4)  | 136.46(11) | O(9)-Tb(2)-O(2W)  | 83.09(10)  |
| O(3W)-Tb(2)-O(2W) | 75.00(11)  | O(4)-Tb(2)-O(2W)  | 147.64(10) |
| O(9)-Tb(2)-O(1)   | 64.33(9)   | O(3W)-Tb(2)-O(1)  | 133.85(10) |
| O(4)-Tb(2)-O(1)   | 82.72(10)  | O(2W)-Tb(2)-O(1)  | 74.42(10)  |
| O(9)-Tb(2)-O(13)  | 91.19(10)  | O(3W)-Tb(2)-O(13) | 74.78(11)  |
| O(4)-Tb(2)-O(13)  | 73.22(11)  | O(2W)-Tb(2)-O(13) | 119.55(11) |
| O(1)-Tb(2)-O(13)  | 151.26(10) | O(9)-Tb(2)-N(1)   | 129.38(10) |
| O(3W)-Tb(2)-N(1)  | 75.91(11)  | O(4)-Tb(2)-N(1)   | 111.29(10) |
| O(2W)-Tb(2)-N(1)  | 79.67(11)  | O(1)-Tb(2)-N(1)   | 65.26(10)  |
| O(13)-Tb(2)-N(1)  | 138.37(11) | O(9)-Tb(2)-N(2)   | 131.38(10) |
| O(3W)-Tb(2)-N(2)  | 76.66(11)  | O(4)-Tb(2)-N(2)   | 65.35(10)  |
| O(2W)-Tb(2)-N(2)  | 145.29(11) | O(1)-Tb(2)-N(2)   | 113.41(10) |
| O(13)-Tb(2)-N(2)  | 70.63(11)  | N(1)-Tb(2)-N(2)   | 74.32(10)  |
| O(9)-Tb(2)-O(15)  | 71.32(10)  | O(3W)-Tb(2)-O(15) | 73.64(11)  |
| O(4)-Tb(2)-O(15)  | 105.32(11) | O(2W)-Tb(2)-O(15) | 72.45(12)  |
| O(1)-Tb(2)-O(15)  | 126.79(10) | O(13)-Tb(2)-O(15) | 49.25(11)  |
| N(1)-Tb(2)-O(15)  | 142.92(11) | N(2)-Tb(2)-O(15)  | 117.66(11) |
| O(5)-Tb(3)-O(7)   | 73.99(10)  | O(5)-Tb(3)-O(4)   | 119.08(10) |
| O(7)-Tb(3)-O(4)   | 130.41(10) | O(5)-Tb(3)-O(8)   | 70.24(10)  |
| O(7)-Tb(3)-O(8)   | 61.08(10)  | O(4)-Tb(3)-O(8)   | 78.16(10)  |
| O(5)-Tb(3)-O(6W)  | 71.16(12)  | O(7)-Tb(3)-O(6W)  | 80.82(11)  |
| O(4)-Tb(3)-O(6W)  | 148.03(11) | O(8)-Tb(3)-O(6W)  | 131.47(11) |
| O(5)-Tb(3)-O(9)   | 142.05(10) | O(7)-Tb(3)-O(9)   | 76.48(10)  |
| O(4)-Tb(3)-O(9)   | 66.01(9)   | O(8)-Tb(3)-O(9)   | 74.85(9)   |
| O(6W)-Tb(3)-O(9)  | 126.50(11) | O(5)-Tb(3)-O(4W)  | 133.05(15) |
| O(7)-Tb(3)-O(4W)  | 81.0(2)    | O(4)-Tb(3)-O(4W)  | 107.47(16) |
| O(8)-Tb(3)-O(4W)  | 128.69(17) | O(6W)-Tb(3)-O(4W) | 66.02(14)  |
| O(9)-Tb(3)-O(4W)  | 62.98(13)  | O(5)-Tb(3)-O(5W)  | 121.35(12) |
| O(7)-Tb(3)-O(5W)  | 142.05(13) | O(4)-Tb(3)-O(5W)  | 75.72(11)  |

|                   |            |                   |            |
|-------------------|------------|-------------------|------------|
| O(8)-Tb(3)-O(5W)  | 153.75(11) | O(6W)-Tb(3)-O(5W) | 73.67(12)  |
| O(9)-Tb(3)-O(5W)  | 96.58(12)  | O(4W)-Tb(3)-O(5W) | 63.2(2)    |
| O(5)-Tb(3)-N(6)   | 67.50(11)  | O(7)-Tb(3)-N(6)   | 139.55(12) |
| O(4)-Tb(3)-N(6)   | 64.16(11)  | O(8)-Tb(3)-N(6)   | 93.75(11)  |
| O(6W)-Tb(3)-N(6)  | 97.65(12)  | O(9)-Tb(3)-N(6)   | 130.16(10) |
| O(4W)-Tb(3)-N(6)  | 135.5(2)   | O(5W)-Tb(3)-N(6)  | 72.59(14)  |
| O(5)-Tb(4)-O(7)   | 72.89(10)  | O(5)-Tb(4)-O(2)   | 139.06(10) |
| O(7)-Tb(4)-O(2)   | 70.94(10)  | O(5)-Tb(4)-O(8)   | 70.34(10)  |
| O(7)-Tb(4)-O(8)   | 60.47(10)  | O(2)-Tb(4)-O(8)   | 75.54(9)   |
| O(5)-Tb(4)-O(8W)  | 135.85(11) | O(7)-Tb(4)-O(8W)  | 139.26(11) |
| O(2)-Tb(4)-O(8W)  | 84.95(11)  | O(8)-Tb(4)-O(8W)  | 144.48(11) |
| O(5)-Tb(4)-O(7W)  | 104.11(11) | O(7)-Tb(4)-O(7W)  | 73.25(11)  |
| O(2)-Tb(4)-O(7W)  | 83.21(11)  | O(8)-Tb(4)-O(7W)  | 133.12(11) |
| O(8W)-Tb(4)-O(7W) | 71.64(13)  | O(5)-Tb(4)-O(18)  | 76.00(12)  |
| O(7)-Tb(4)-O(18)  | 142.61(11) | O(2)-Tb(4)-O(18)  | 126.38(12) |
| O(8)-Tb(4)-O(18)  | 89.85(11)  | O(8W)-Tb(4)-O(18) | 78.10(12)  |
| O(7W)-Tb(4)-O(18) | 135.31(12) | O(5)-Tb(4)-O(16)  | 114.74(11) |
| O(7)-Tb(4)-O(16)  | 128.58(10) | O(2)-Tb(4)-O(16)  | 75.54(11)  |
| O(8)-Tb(4)-O(16)  | 74.23(10)  | O(8W)-Tb(4)-O(16) | 72.28(12)  |
| O(7W)-Tb(4)-O(16) | 139.33(12) | O(18)-Tb(4)-O(16) | 50.86(12)  |
| O(5)-Tb(4)-O(6)   | 62.15(10)  | O(7)-Tb(4)-O(6)   | 109.76(11) |
| O(2)-Tb(4)-O(6)   | 150.38(10) | O(8)-Tb(4)-O(6)   | 131.81(9)  |
| O(8W)-Tb(4)-O(6)  | 76.11(11)  | O(7W)-Tb(4)-O(6)  | 69.40(12)  |
| O(18)-Tb(4)-O(6)  | 71.97(13)  | O(16)-Tb(4)-O(6)  | 118.51(12) |

### 3

|             |          |             |          |
|-------------|----------|-------------|----------|
| Dy(1)-O(2)  | 2.328(4) | Dy(1)-O(8)  | 2.332(4) |
| Dy(1)-O(7)  | 2.366(4) | Dy(1)-O(9)  | 2.386(4) |
| Dy(1)-O(1)  | 2.426(4) | Dy(1)-O(10) | 2.486(4) |
| Dy(1)-O(1W) | 2.503(5) | Dy(1)-O(12) | 2.500(4) |
| Dy(1)-N(4)  | 2.554(5) | Dy(2)-O(9)  | 2.377(4) |
| Dy(2)-O(2W) | 2.402(4) | Dy(2)-O(1)  | 2.411(4) |
| Dy(2)-O(4)  | 2.417(4) | Dy(2)-O(3W) | 2.411(4) |
| Dy(2)-O(13) | 2.448(5) | Dy(2)-N(1)  | 2.509(5) |
| Dy(2)-N(2)  | 2.542(5) | Dy(2)-O(15) | 2.556(4) |
| Dy(3)-O(7)  | 2.306(4) | Dy(3)-O(5)  | 2.315(4) |
| Dy(3)-O(4)  | 2.365(4) | Dy(3)-O(8)  | 2.376(4) |
| Dy(3)-O(6W) | 2.415(4) | Dy(3)-O(9)  | 2.421(4) |
| Dy(3)-N(6)  | 2.522(5) | Dy(3)-O(5W) | 2.522(4) |
| Dy(3)-O(4W) | 2.555(6) | Dy(4)-O(5)  | 2.297(4) |
| Dy(4)-O(2)  | 2.350(4) | Dy(4)-O(8)  | 2.370(4) |
| Dy(4)-O(7)  | 2.387(4) | Dy(4)-O(7W) | 2.408(4) |
| Dy(4)-O(8W) | 2.421(4) | Dy(4)-O(18) | 2.475(4) |
| Dy(4)-O(16) | 2.498(5) | Dy(4)-O(6)  | 2.649(4) |



|                   |            |                   |            |
|-------------------|------------|-------------------|------------|
| O(2)-Dy(1)-O(8)   | 77.27(14)  | O(2)-Dy(1)-O(7)   | 71.63(14)  |
| O(8)-Dy(1)-O(7)   | 61.06(14)  | O(2)-Dy(1)-O(9)   | 145.11(14) |
| O(8)-Dy(1)-O(9)   | 76.97(13)  | O(7)-Dy(1)-O(9)   | 75.45(13)  |
| O(2)-Dy(1)-O(1)   | 128.52(14) | O(8)-Dy(1)-O(1)   | 73.60(14)  |
| O(7)-Dy(1)-O(1)   | 124.62(14) | O(9)-Dy(1)-O(1)   | 64.30(13)  |
| O(2)-Dy(1)-O(10)  | 121.94(15) | O(8)-Dy(1)-O(10)  | 143.77(14) |
| O(7)-Dy(1)-O(10)  | 149.89(15) | O(9)-Dy(1)-O(10)  | 92.55(14)  |
| O(1)-Dy(1)-O(10)  | 70.64(14)  | O(2)-Dy(1)-O(1W)  | 108.56(16) |
| O(8)-Dy(1)-O(1W)  | 133.08(15) | O(7)-Dy(1)-O(1W)  | 76.40(15)  |
| O(9)-Dy(1)-O(1W)  | 73.87(15)  | O(1)-Dy(1)-O(1W)  | 122.41(16) |
| O(10)-Dy(1)-O(1W) | 73.73(15)  | O(2)-Dy(1)-O(12)  | 73.69(15)  |
| O(8)-Dy(1)-O(12)  | 147.17(15) | O(7)-Dy(1)-O(12)  | 121.48(14) |
| O(9)-Dy(1)-O(12)  | 135.73(14) | O(1)-Dy(1)-O(12)  | 113.89(14) |
| O(10)-Dy(1)-O(12) | 51.25(14)  | O(1W)-Dy(1)-O(12) | 71.96(15)  |
| O(2)-Dy(1)-N(4)   | 71.28(16)  | O(8)-Dy(1)-N(4)   | 83.16(15)  |
| O(7)-Dy(1)-N(4)   | 132.87(16) | O(9)-Dy(1)-N(4)   | 127.84(15) |
| O(1)-Dy(1)-N(4)   | 63.92(15)  | O(10)-Dy(1)-N(4)  | 76.21(16)  |
| O(1W)-Dy(1)-N(4)  | 143.59(16) | O(12)-Dy(1)-N(4)  | 73.34(16)  |
| O(9)-Dy(2)-O(2W)  | 82.61(13)  | O(9)-Dy(2)-O(1)   | 64.67(13)  |
| O(2W)-Dy(2)-O(1)  | 74.77(14)  | O(9)-Dy(2)-O(4)   | 66.47(13)  |
| O(2W)-Dy(2)-O(4)  | 147.22(13) | O(1)-Dy(2)-O(4)   | 82.08(14)  |
| O(9)-Dy(2)-O(3W)  | 144.37(15) | O(2W)-Dy(2)-O(3W) | 80.61(16)  |
| O(1)-Dy(2)-O(3W)  | 138.17(16) | O(4)-Dy(2)-O(3W)  | 131.19(16) |
| O(9)-Dy(2)-O(13)  | 92.62(15)  | O(2W)-Dy(2)-O(13) | 119.93(16) |
| O(1)-Dy(2)-O(13)  | 152.32(15) | O(4)-Dy(2)-O(13)  | 73.99(15)  |
| O(3W)-Dy(2)-O(13) | 69.49(16)  | O(9)-Dy(2)-N(1)   | 130.06(15) |
| O(2W)-Dy(2)-N(1)  | 80.09(15)  | O(1)-Dy(2)-N(1)   | 65.65(15)  |
| O(4)-Dy(2)-N(1)   | 111.15(14) | O(3W)-Dy(2)-N(1)  | 77.27(16)  |
| O(13)-Dy(2)-N(1)  | 136.30(16) | O(9)-Dy(2)-N(2)   | 131.56(15) |
| O(2W)-Dy(2)-N(2)  | 145.63(15) | O(1)-Dy(2)-N(2)   | 113.05(14) |
| O(4)-Dy(2)-N(2)   | 65.40(15)  | O(3W)-Dy(2)-N(2)  | 71.98(17)  |
| O(13)-Dy(2)-N(2)  | 69.29(15)  | N(1)-Dy(2)-N(2)   | 74.04(15)  |
| O(9)-Dy(2)-O(15)  | 72.83(14)  | O(2W)-Dy(2)-O(15) | 72.11(16)  |
| O(1)-Dy(2)-O(15)  | 128.48(15) | O(4)-Dy(2)-O(15)  | 106.76(16) |
| O(3W)-Dy(2)-O(15) | 72.17(15)  | O(13)-Dy(2)-O(15) | 49.82(15)  |
| N(1)-Dy(2)-O(15)  | 141.31(16) | N(2)-Dy(2)-O(15)  | 116.68(16) |
| O(7)-Dy(3)-O(5)   | 74.27(14)  | O(7)-Dy(3)-O(4)   | 130.19(14) |
| O(5)-Dy(3)-O(4)   | 119.03(14) | O(7)-Dy(3)-O(8)   | 61.28(14)  |
| O(5)-Dy(3)-O(8)   | 70.07(14)  | O(4)-Dy(3)-O(8)   | 78.02(14)  |
| O(7)-Dy(3)-O(6W)  | 78.58(15)  | O(5)-Dy(3)-O(6W)  | 72.11(15)  |
| O(4)-Dy(3)-O(6W)  | 150.07(15) | O(8)-Dy(3)-O(6W)  | 130.47(15) |
| O(7)-Dy(3)-O(9)   | 75.90(14)  | O(5)-Dy(3)-O(9)   | 142.20(14) |
| O(4)-Dy(3)-O(9)   | 66.59(13)  | O(8)-Dy(3)-O(9)   | 75.49(13)  |
| O(6W)-Dy(3)-O(9)  | 123.43(15) | O(7)-Dy(3)-N(6)   | 139.87(16) |

|                   |            |                   |            |
|-------------------|------------|-------------------|------------|
| O(5)-Dy(3)-N(6)   | 67.40(15)  | O(4)-Dy(3)-N(6)   | 64.57(16)  |
| O(8)-Dy(3)-N(6)   | 93.91(15)  | O(6W)-Dy(3)-N(6)  | 99.94(17)  |
| O(9)-Dy(3)-N(6)   | 131.15(15) | O(7)-Dy(3)-O(5W)  | 141.84(16) |
| O(5)-Dy(3)-O(5W)  | 124.71(15) | O(4)-Dy(3)-O(5W)  | 73.50(15)  |
| O(8)-Dy(3)-O(5W)  | 151.51(14) | O(6W)-Dy(3)-O(5W) | 77.65(15)  |
| O(9)-Dy(3)-O(5W)  | 93.07(15)  | N(6)-Dy(3)-O(5W)  | 73.87(17)  |
| O(7)-Dy(3)-O(4W)  | 80.4(2)    | O(5)-Dy(3)-O(4W)  | 137.5(2)   |
| O(4)-Dy(3)-O(4W)  | 103.4(2)   | O(8)-Dy(3)-O(4W)  | 124.9(2)   |
| O(6W)-Dy(3)-O(4W) | 69.7(2)    | O(9)-Dy(3)-O(4W)  | 56.80(19)  |
| N(6)-Dy(3)-O(4W)  | 137.3(2)   | O(5W)-Dy(3)-O(4W) | 63.5(2)    |
| O(5)-Dy(4)-O(2)   | 139.56(15) | O(5)-Dy(4)-O(8)   | 70.47(13)  |
| O(2)-Dy(4)-O(8)   | 76.09(13)  | O(5)-Dy(4)-O(7)   | 73.07(14)  |
| O(2)-Dy(4)-O(7)   | 70.87(14)  | O(8)-Dy(4)-O(7)   | 60.22(13)  |
| O(5)-Dy(4)-O(7W)  | 104.53(15) | O(2)-Dy(4)-O(7W)  | 82.72(15)  |
| O(8)-Dy(4)-O(7W)  | 133.83(14) | O(7)-Dy(4)-O(7W)  | 74.23(14)  |
| O(5)-Dy(4)-O(8W)  | 135.14(15) | O(2)-Dy(4)-O(8W)  | 85.23(15)  |
| O(8)-Dy(4)-O(8W)  | 143.31(15) | O(7)-Dy(4)-O(8W)  | 141.21(15) |
| O(7W)-Dy(4)-O(8W) | 72.74(16)  | O(5)-Dy(4)-O(18)  | 75.57(16)  |
| O(2)-Dy(4)-O(18)  | 126.67(17) | O(8)-Dy(4)-O(18)  | 89.31(15)  |
| O(7)-Dy(4)-O(18)  | 141.96(15) | O(7W)-Dy(4)-O(18) | 135.22(16) |
| O(8W)-Dy(4)-O(18) | 76.83(16)  | O(5)-Dy(4)-O(16)  | 114.45(15) |
| O(2)-Dy(4)-O(16)  | 75.63(15)  | O(8)-Dy(4)-O(16)  | 73.51(14)  |
| O(7)-Dy(4)-O(16)  | 127.62(14) | O(7W)-Dy(4)-O(16) | 139.19(16) |
| O(8W)-Dy(4)-O(16) | 71.36(16)  | O(18)-Dy(4)-O(16) | 51.09(16)  |
| O(5)-Dy(4)-O(6)   | 61.91(14)  | O(2)-Dy(4)-O(6)   | 149.68(14) |
| O(8)-Dy(4)-O(6)   | 131.77(14) | O(7)-Dy(4)-O(6)   | 109.68(15) |
| O(7W)-Dy(4)-O(6)  | 68.96(15)  | O(8W)-Dy(4)-O(6)  | 76.42(15)  |
| O(18)-Dy(4)-O(6)  | 72.53(17)  | O(16)-Dy(4)-O(6)  | 119.37(15) |

**Symmetry transformations used to generate equivalent atoms: #1 -x+1, -y, -z+1**

Table S3 Hydrogen-bonding geometries for the ligand.

| D-H...A           | Symmetry code | D-H(Å) | H...A(Å) | D...A(Å) | D-H...A(°) |
|-------------------|---------------|--------|----------|----------|------------|
| N(2)-H(2A)...O(4) |               | 0.88   | 1.82     | 2.669(2) | 161.4      |
| N(3)-H(3)...O(3)  | -x+1,-y,-z+1  | 0.88   | 1.94     | 2.771(2) | 157.7      |
| O(2)-H(2)...N(1)  |               | 0.84   | 1.88     | 2.616(2) | 145.0      |
| O(5)-H(5)...N(6)  |               | 0.84   | 1.88     | 2.609(3) | 144.5      |

**Table S4 Coordination sphere of peripheral Ln atoms indicated by the SHAPE program<sup>[3]</sup>.**

| <b>Metal ions</b> | <b>Coordination Number</b>             | <b>Coordination sphere</b> | <b>CShM value</b> | <b>Shape</b>                       | <b>Symmetry</b>       |
|-------------------|----------------------------------------|----------------------------|-------------------|------------------------------------|-----------------------|
| <b>Gd(1)</b>      | 9 (NO <sub>8</sub> mode)               | MFF-9                      | 22.09008          | Muffin                             | <i>C<sub>s</sub></i>  |
|                   |                                        | CSAPR-9                    | 22.11056          | Spherical capped square antiprism  | <i>C<sub>4v</sub></i> |
|                   |                                        | TCTPR-9                    | 22.91991          | Spherical tricapped trigonal prism | <i>D<sub>3h</sub></i> |
|                   |                                        | JCSAPR-9                   | 23.93726          | Capped square antiprism J10        | <i>C<sub>4v</sub></i> |
|                   |                                        | JTCTPR-9                   | 25.54826          | Tricapped trigonal prism J51       | <i>D<sub>3h</sub></i> |
|                   |                                        | HH-9                       | 26.74937          | Hula-hoop                          | <i>C<sub>2v</sub></i> |
|                   |                                        | CCU-9                      | 27.10824          | Spherical-relaxed capped cube      | <i>C<sub>4v</sub></i> |
|                   |                                        | JCCU-9                     | 28.07256          | Capped cube J8                     | <i>C<sub>4v</sub></i> |
|                   |                                        | JTC-9                      | 28.12732          | Johnson triangular cupola J3       | <i>C<sub>3v</sub></i> |
|                   |                                        | JTDIC-9                    | 30.89386          | Tridiminished icosahedron J63      | <i>C<sub>3v</sub></i> |
|                   |                                        | HBPY-9                     | 30.92638          | Heptagonal bipyramid               | <i>D<sub>7h</sub></i> |
|                   |                                        | OPY-9                      | 35.70801          | Octagonal pyramid                  | <i>C<sub>8v</sub></i> |
|                   |                                        | EP-9                       | 40.37884          | Enneagon                           | <i>D<sub>9h</sub></i> |
| <b>Gd(2)</b>      | 9 (N <sub>2</sub> O <sub>7</sub> mode) | JCSAPR-9                   | 22.53433          | Capped square antiprism J10        | <i>C<sub>4v</sub></i> |
|                   |                                        | MFF-9                      | 22.82765          | Muffin                             | <i>C<sub>s</sub></i>  |
|                   |                                        | JTCTPR-9                   | 23.11447          | Tricapped trigonal prism J51       | <i>D<sub>3h</sub></i> |
|                   |                                        | CSAPR-9                    | 23.12328          | Spherical capped square antiprism  | <i>C<sub>4v</sub></i> |
|                   |                                        | TCTPR-9                    | 23.58377          | Spherical tricapped trigonal prism | <i>D<sub>3h</sub></i> |
|                   |                                        | JCCU-9                     | 25.57449          | Capped cube J8                     | <i>C<sub>4v</sub></i> |
|                   |                                        | CCU-9                      | 25.7775           | Spherical-relaxed capped cube      | <i>C<sub>4v</sub></i> |
|                   |                                        | HH-9                       | 26.48263          | Hula-hoop                          | <i>C<sub>2v</sub></i> |
|                   |                                        | JTC-9                      | 28.54664          | Johnson triangular cupola J3       | <i>C<sub>3v</sub></i> |
|                   |                                        | JTDIC-9                    | 29.62449          | Tridiminished icosahedron J63      | <i>C<sub>3v</sub></i> |
|                   |                                        | HBPY-9                     | 34.1006           | Heptagonal bipyramid               | <i>D<sub>7h</sub></i> |
|                   |                                        | OPY-9                      | 36.09615          | Octagonal pyramid                  | <i>C<sub>8v</sub></i> |
|                   |                                        | EP-9                       | 43.70385          | Enneagon                           | <i>D<sub>9h</sub></i> |
| <b>Gd(3)</b>      | 9 (NO <sub>8</sub> mode)               | MFF-9                      | 21.82866          | Muffin                             | <i>C<sub>s</sub></i>  |
|                   |                                        | CSAPR-9                    | 22.35077          | Spherical capped square antiprism  | <i>C<sub>4v</sub></i> |
|                   |                                        | JCSAPR-9                   | 22.64098          | Capped square antiprism J10        | <i>C<sub>4v</sub></i> |
|                   |                                        | JTCTPR-9                   | 22.71645          | Tricapped trigonal prism J51       | <i>D<sub>3h</sub></i> |
|                   |                                        | TCTPR-9                    | 22.9588           | Spherical tricapped trigonal prism | <i>D<sub>3h</sub></i> |
|                   |                                        | JTC-9                      | 23.05172          | Johnson triangular cupola J3       | <i>C<sub>3v</sub></i> |
|                   |                                        | CCU-9                      | 25.01687          | Spherical-relaxed capped cube      | <i>C<sub>4v</sub></i> |
|                   |                                        | JCCU-9                     | 25.76126          | Capped cube J8                     | <i>C<sub>4v</sub></i> |
|                   |                                        | HH-9                       | 27.12729          | Hula-hoop                          | <i>C<sub>2v</sub></i> |
|                   |                                        | JTDIC-9                    | 30.33794          | Tridiminished icosahedron J63      | <i>C<sub>3v</sub></i> |
|                   |                                        | OPY-9                      | 30.73049          | Octagonal pyramid                  | <i>C<sub>8v</sub></i> |
|                   |                                        | HBPY-9                     | 33.68158          | Heptagonal bipyramid               | <i>D<sub>7h</sub></i> |
|                   |                                        | EP-9                       | 42.91052          | Enneagon                           | <i>D<sub>9h</sub></i> |
| <b>Gd(4)</b>      | 9 (O <sub>9</sub> mode)                | JTCTPR-9                   | 21.40367          | Tricapped trigonal prism J51       | <i>D<sub>3h</sub></i> |
|                   |                                        | MFF-9                      | 21.49983          | Muffin                             | <i>C<sub>s</sub></i>  |

|              |                                        |              |                          |                                    |          |
|--------------|----------------------------------------|--------------|--------------------------|------------------------------------|----------|
|              |                                        | JCSAPR-9     | 21.59685                 | Capped square antiprism J10        | $C_{4v}$ |
|              |                                        | CSAPR-9      | 21.62744                 | Spherical capped square antiprism  | $C_{4v}$ |
|              |                                        | TCTPR-9      | 22.41307                 | Spherical tricapped trigonal prism | $D_{3h}$ |
|              |                                        | JTC-9        | 23.50101                 | Johnson triangular cupola J3       | $C_{3v}$ |
|              |                                        | JCCU-9       | 27.46689                 | Capped cube J8                     | $C_{4v}$ |
|              |                                        | JTDIC-9      | 27.66357                 | Tridiminished icosahedron J63      | $C_{3v}$ |
|              |                                        | CCU-9        | 27.73131                 | Spherical-relaxed capped cube      | $C_{4v}$ |
|              |                                        | HH-9         | 28.1476                  | Hula-hoop                          | $C_{2v}$ |
|              |                                        | OPY-9        | 33.9598                  | Octagonal pyramid                  | $C_{8v}$ |
|              |                                        | HBPY-9       | 34.61125                 | Heptagonal bipyramid               | $D_{7h}$ |
|              |                                        | EP-9         | 43.44815                 | Enneagon                           | $D_{9h}$ |
| <b>Tb(1)</b> | 9 (NO <sub>8</sub> mode)               | CSAPR-9      | 1.44256                  | Spherical capped square antiprism  | $C_{4v}$ |
|              |                                        | MFF-9        | 2.11992                  | Muffin                             | $C_s$    |
|              |                                        | TCTPR-9      | 2.40717                  | Spherical tricapped trigonal prism | $D_{3h}$ |
|              |                                        | JCSAPR-9     | 2.47767                  | Capped square antiprism J10        | $C_{4v}$ |
|              |                                        | JTCTPR-9     | 3.38707                  | Tricapped trigonal prism J51       | $D_{3h}$ |
|              |                                        | CCU-9        | 7.90089                  | Spherical-relaxed capped cube      | $C_{4v}$ |
|              |                                        | JCCU-9       | 9.39317                  | Capped cube J8                     | $C_{4v}$ |
|              |                                        | HH-9         | 11.05493                 | Hula-hoop                          | $C_{2v}$ |
|              |                                        | JTDIC-9      | 12.71984                 | Tridiminished icosahedron J63      | $C_{3v}$ |
|              |                                        | JTC-9        | 14.51745                 | Johnson triangular cupola J3       | $C_{3v}$ |
|              |                                        | HBPY-9       | 15.80814                 | Heptagonal bipyramid               | $D_{7h}$ |
|              |                                        | OPY-9        | 20.20395                 | Octagonal pyramid                  | $C_{8v}$ |
| EP-9         | 34.29652                               | Enneagon     | $D_{9h}$                 |                                    |          |
| <b>Tb(2)</b> | 9 (N <sub>2</sub> O <sub>7</sub> mode) | MFF-9        | 1.70587                  | Muffin                             | $C_s$    |
|              |                                        | CSAPR-9      | 1.96993                  | Spherical capped square antiprism  | $C_{4v}$ |
|              |                                        | JCSAPR-9     | 2.51328                  | Capped square antiprism J10        | $C_{4v}$ |
|              |                                        | TCTPR-9      | 2.95089                  | Spherical tricapped trigonal prism | $D_{3h}$ |
|              |                                        | JTCTPR-9     | 4.26509                  | Tricapped trigonal prism J51       | $D_{3h}$ |
|              |                                        | CCU-9        | 7.40098                  | Spherical-relaxed capped cube      | $C_{4v}$ |
|              |                                        | HH-9         | 8.79849                  | Hula-hoop                          | $C_{2v}$ |
|              |                                        | JCCU-9       | 8.85546                  | Capped cube J8                     | $C_{4v}$ |
|              |                                        | JTDIC-9      | 11.14905                 | Tridiminished icosahedron J63      | $C_{3v}$ |
|              |                                        | JTC-9        | 16.35569                 | Johnson triangular cupola J3       | $C_{3v}$ |
|              |                                        | HBPY-9       | 17.33882                 | Heptagonal bipyramid               | $D_{7h}$ |
|              |                                        | OPY-9        | 22.89401                 | Octagonal pyramid                  | $C_{8v}$ |
|              |                                        | EP-9         | 35.95851                 | Enneagon                           | $D_{9h}$ |
|              |                                        | <b>Tb(3)</b> | 9 (NO <sub>8</sub> mode) | MFF-9                              | 1.24294  |
| CSAPR-9      | 1.88147                                |              |                          | Spherical capped square antiprism  | $C_{4v}$ |
| TCTPR-9      | 2.31792                                |              |                          | Spherical tricapped trigonal prism | $D_{3h}$ |
| JCSAPR-9     | 3.13503                                |              |                          | Capped square antiprism J10        | $C_{4v}$ |
| JTCTPR-9     | 4.19352                                |              |                          | Tricapped trigonal prism J51       | $D_{3h}$ |
| CCU-9        | 7.20012                                |              |                          | Spherical-relaxed capped cube      | $C_{4v}$ |

|              |                    |          |          |                                    |          |
|--------------|--------------------|----------|----------|------------------------------------|----------|
|              |                    | JCCU-9   | 8.51408  | Capped cube J8                     | $C_{4v}$ |
|              |                    | HH-9     | 8.72231  | Hula-hoop                          | $C_{2v}$ |
|              |                    | JTDIC-9  | 12.11484 | Tridiminished icosahedron J63      | $C_{3v}$ |
|              |                    | JTC-9    | 15.71514 | Johnson triangular cupola J3       | $C_{3v}$ |
|              |                    | HBPY-9   | 16.14691 | Heptagonal bipyramid               | $D_{7h}$ |
|              |                    | OPY-9    | 23.46466 | Octagonal pyramid                  | $C_{8v}$ |
|              |                    | EP-9     | 35.65003 | Enneagon                           | $D_{9h}$ |
| <b>Tb(4)</b> | 9 ( $O_9$ mode)    | MFF-9    | 1.16671  | Muffin                             | $C_s$    |
|              |                    | CSAPR-9  | 1.29212  | Spherical capped square antiprism  | $C_{4v}$ |
|              |                    | JCSAPR-9 | 2.10467  | Capped square antiprism J10        | $C_{4v}$ |
|              |                    | TCTPR-9  | 2.15706  | Spherical tricapped trigonal prism | $D_{3h}$ |
|              |                    | JTCTPR-9 | 3.22025  | Tricapped trigonal prism J51       | $D_{3h}$ |
|              |                    | CCU-9    | 9.62056  | Spherical-relaxed capped cube      | $C_{4v}$ |
|              |                    | HH-9     | 10.33293 | Hula-hoop                          | $C_{2v}$ |
|              |                    | JCCU-9   | 10.62396 | Capped cube J8                     | $C_{4v}$ |
|              |                    | JTDIC-9  | 11.09969 | Tridiminished icosahedron J63      | $C_{3v}$ |
|              |                    | JTC-9    | 15.47868 | Johnson triangular cupola J3       | $C_{3v}$ |
|              |                    | HBPY-9   | 19.56801 | Heptagonal bipyramid               | $D_{7h}$ |
|              |                    | OPY-9    | 22.81858 | Octagonal pyramid                  | $C_{8v}$ |
| EP-9         | 33.97814           | Enneagon | $D_{9h}$ |                                    |          |
| <b>Dy(1)</b> | 9 ( $NO_8$ mode)   | CSAPR-9  | 1.3436   | Spherical capped square antiprism  | $C_{4v}$ |
|              |                    | MFF-9    | 2.04008  | Muffin                             | $C_s$    |
|              |                    | TCTPR-9  | 2.23976  | Spherical tricapped trigonal prism | $D_{3h}$ |
|              |                    | JCSAPR-9 | 2.36062  | Capped square antiprism J10        | $C_{4v}$ |
|              |                    | JTCTPR-9 | 3.5522   | Tricapped trigonal prism J51       | $D_{3h}$ |
|              |                    | CCU-9    | 7.68433  | Spherical-relaxed capped cube      | $C_{4v}$ |
|              |                    | JCCU-9   | 9.16827  | Capped cube J8                     | $C_{4v}$ |
|              |                    | HH-9     | 11.21442 | Hula-hoop                          | $C_{2v}$ |
|              |                    | JTDIC-9  | 12.63875 | Tridiminished icosahedron J63      | $C_{3v}$ |
|              |                    | JTC-9    | 15.04718 | Johnson triangular cupola J3       | $C_{3v}$ |
|              |                    | HBPY-9   | 15.95916 | Heptagonal bipyramid               | $D_{7h}$ |
|              |                    | OPY-9    | 19.98125 | Octagonal pyramid                  | $C_{8v}$ |
| EP-9         | 35.08856           | Enneagon | $D_{9h}$ |                                    |          |
| <b>Dy(2)</b> | 9 ( $N_2O_7$ mode) | MFF-9    | 1.72382  | Muffin                             | $C_s$    |
|              |                    | CSAPR-9  | 1.83269  | Spherical capped square antiprism  | $C_{4v}$ |
|              |                    | JCSAPR-9 | 2.43645  | Capped square antiprism J10        | $C_{4v}$ |
|              |                    | TCTPR-9  | 2.48893  | Spherical tricapped trigonal prism | $D_{3h}$ |
|              |                    | JTCTPR-9 | 4.2165   | Tricapped trigonal prism J51       | $D_{3h}$ |
|              |                    | CCU-9    | 7.87988  | Spherical-relaxed capped cube      | $C_{4v}$ |
|              |                    | HH-9     | 8.95358  | Hula-hoop                          | $C_{2v}$ |
|              |                    | JCCU-9   | 9.20937  | Capped cube J8                     | $C_{4v}$ |
|              |                    | JTDIC-9  | 10.5208  | Tridiminished icosahedron J63      | $C_{3v}$ |
|              |                    | JTC-9    | 16.21003 | Johnson triangular cupola J3       | $C_{3v}$ |

|              |                  |          |          |                                    |          |
|--------------|------------------|----------|----------|------------------------------------|----------|
|              |                  | HBPY-9   | 16.75571 | Heptagonal bipyramid               | $D_{7h}$ |
|              |                  | OPY-9    | 22.34561 | Octagonal pyramid                  | $C_{8v}$ |
|              |                  | EP-9     | 35.78242 | Enneagon                           | $D_{9h}$ |
| <b>Dy(3)</b> | 9 ( $NO_8$ mode) | MFF-9    | 1.46539  | Muffin                             | $C_s$    |
|              |                  | CSAPR-9  | 2.09559  | Spherical capped square antiprism  | $C_{4v}$ |
|              |                  | TCTPR-9  | 2.75335  | Spherical tricapped trigonal prism | $D_{3h}$ |
|              |                  | JCSAPR-9 | 3.30091  | Capped square antiprism J10        | $C_{4v}$ |
|              |                  | JTCTPR-9 | 4.28724  | Tricapped trigonal prism J51       | $D_{3h}$ |
|              |                  | CCU-9    | 7.42348  | Spherical-relaxed capped cube      | $C_{4v}$ |
|              |                  | JCCU-9   | 8.57101  | Capped cube J8                     | $C_{4v}$ |
|              |                  | HH-9     | 8.57839  | Hula-hoop                          | $C_{2v}$ |
|              |                  | JTDIC-9  | 11.83282 | Tridiminished icosahedron J63      | $C_{3v}$ |
|              |                  | JTC-9    | 15.44273 | Johnson triangular cupola J3       | $C_{3v}$ |
|              |                  | HBPY-9   | 15.55447 | Heptagonal bipyramid               | $D_{7h}$ |
|              |                  | OPY-9    | 22.71552 | Octagonal pyramid                  | $C_{8v}$ |
|              |                  | EP-9     | 34.81173 | Enneagon                           | $D_{9h}$ |
| <b>Dy(4)</b> | 9 ( $O_9$ mode)  | MFF-9    | 1.19948  | Muffin                             | $C_s$    |
|              |                  | CSAPR-9  | 1.23661  | Spherical capped square antiprism  | $C_{4v}$ |
|              |                  | TCTPR-9  | 2.0785   | Spherical tricapped trigonal prism | $D_{3h}$ |
|              |                  | JCSAPR-9 | 2.10146  | Capped square antiprism J10        | $C_{4v}$ |
|              |                  | JTCTPR-9 | 3.20984  | Tricapped trigonal prism J51       | $D_{3h}$ |
|              |                  | CCU-9    | 9.77244  | Spherical-relaxed capped cube      | $C_{4v}$ |
|              |                  | HH-9     | 10.67888 | Hula-hoop                          | $C_{2v}$ |
|              |                  | JCCU-9   | 10.81779 | Capped cube J8                     | $C_{4v}$ |
|              |                  | JTDIC-9  | 11.28638 | Tridiminished icosahedron J63      | $C_{3v}$ |
|              |                  | JTC-9    | 15.57416 | Johnson triangular cupola J3       | $C_{3v}$ |
|              |                  | HBPY-9   | 19.52953 | Heptagonal bipyramid               | $D_{7h}$ |
|              |                  | OPY-9    | 22.72358 | Octagonal pyramid                  | $C_{8v}$ |
| EP-9         | 34.08958         | Enneagon | $D_{9h}$ |                                    |          |

## References

- [1] G. M. Sheldrick, *Acta Crystallogr. Sect. A: Fundam. Crystallogr.* 2008, **64**, 112.
- [2] P. van der Sluis, A. L. Spek, *Acta Cryst. Sect. A.* 1990, **46**, 194.
- [3] M. Llunell, D. Casanova, J. Cirera, P. Alemany and S. Alvarez, *SHAPE v. 2.1*, University of Barcelona, Barcelona, Spain, 2013.
